# Supplementary material for: The influence of molecular markers and methods on inferring the phylogenetic relationships between the representatives of the Arini (parrots, Psittaciformes), determined on the basis of their complete mitochondrial genomes
Source: PubMed Central journal article supplement (PMC5513162; doi:10.1186/s12862-017-1012-1), 2017-07-14
Supplement: 12862_2017_1012_MOESM2_ESM.pdf [file 12862_2017_1012_MOESM2_ESM.pdf]

**Additional File 2.** Sequence data sets used in the studies with applied substitution models in four programs.

| Data set                  | Markers                    | Alignment length [bp]                                               | Substitution models used in: |                                              |                      |            |
|---------------------------|----------------------------|---------------------------------------------------------------------|------------------------------|----------------------------------------------|----------------------|------------|
|                           |                            |                                                                     | TreeFinder                   | PAUP                                         | MrBayes <sup>5</sup> | PhyloBayes |
| 7 taxa                    | <i>atp6</i>                | 684                                                                 | J3+I,HKY+I,J3+I              | 010020+I                                     | Mix+:I,I,I           | CAT+GTR+Γ  |
|                           | <i>atp8</i>                | 168                                                                 | TN,HKY+I,HKY+I               | 010022+I                                     | Mix+:E,I,I           | CAT+GTR+Γ  |
|                           | <i>cox1</i>                | 1,584                                                               | TN+I,HKY+I,GTR+I             | 012210+Γ                                     | Mix+:I,E,I           | CAT+GTR+Γ  |
|                           | <i>cox2</i>                | 684                                                                 | J2+I,TN+I,HKY+Γ              | 010020+I                                     | Mix+:I,I,Γ           | CAT+GTR+Γ  |
|                           | <i>cox3</i>                | 784                                                                 | J3+I,HKY,J1+I                | 010210+I                                     | Mix+:Γ,E,I           | CAT+GTR+Γ  |
|                           | <i>cytb</i>                | 1,140                                                               | J3+Γ,J1+I,J1+Γ               | 010212+Γ                                     | Mix+:I,I,I           | CAT+GTR+Γ  |
|                           | <i>nd1</i>                 | 981                                                                 | HKY+I,TN+Γ+I,HKY+Γ           | HKY+Γ                                        | Mix+:Γ,I,Γ           | CAT+GTR+Γ  |
|                           | <i>nd2</i>                 | 1,040                                                               | J1+Γ,J1+Γ+I,J3+Γ             | 012034+Γ+I                                   | Mix+:Γ,Γ,Γ           | CAT+GTR+Γ  |
|                           | <i>nd3</i>                 | 350                                                                 | HKY+I,HKY+I,J3+Γ             | 010020+I                                     | Mix+:I,I,I           | CAT+GTR+Γ  |
|                           | <i>nd4</i>                 | 1,393                                                               | J1+Γ,J1+Γ+I,TN+Γ+I           | 010020+I                                     | Mix+:Γ,I,I           | CAT+GTR+Γ  |
|                           | <i>nd4L</i>                | 297                                                                 | HKY,HKY+I,HKY                | 012212+Γ                                     | Mix+:E,I,E           | CAT+GTR+Γ  |
|                           | <i>nd5</i>                 | 1,815                                                               | J3+Γ,HKY+Γ+I,J1+Γ+I          | 010232+Γ+I                                   | Mix+:Γ,I+I,Γ+I       | CAT+GTR+Γ  |
|                           | <i>nd6</i>                 | 513                                                                 | HKY+Γ,J3+I,J2+Γ              | 012340+Γ                                     | Mix+:Γ,I,Γ           | CAT+GTR+Γ  |
|                           | <i>12s rRNA</i>            | 971                                                                 | J3+Γ                         | 010023+Γ+I                                   | Mix+Γ+I              | GTR+Γ      |
|                           | <i>16s rRNA</i>            | 1,567                                                               | GTR+Γ                        | 010234+Γ                                     | Mix+Γ                | GTR+Γ      |
|                           | <i>tRNA1<sup>1</sup></i>   | 560                                                                 | HKY+Γ                        | HKY+Γ+I                                      | Mix+Γ+I              | GTR+Γ      |
|                           | <i>tRNA2<sup>2</sup></i>   | 983                                                                 | J1+Γ                         | 012232+Γ+I                                   | Mix+Γ+I              | GTR+Γ      |
|                           | <i>control region (CR)</i> | 1,478                                                               | TVM+Γ                        | 010213+Γ+I                                   | Mix+Γ+I              | GTR+Γ      |
| <i>ALL<sup>3</sup></i>    | 16,956                     | GTR+Γ+I,J1+Γ+I,J1+Γ+I,HKY+Γ,J3+I,J2+Γ,J3+Γ,GTR+Γ,TVM+Γ,HKY+Γ,J1+Γ   | 012310+Γ                     | Mix+:Γ+I,Γ+I,Γ+I,Γ+I,Γ+I,Γ+I,Γ+I,Γ+I,Γ+I,Γ+I | CAT+GTR+Γ            |            |
| <i>ALL-CR<sup>4</sup></i> | 15,478                     | GTR+Γ+I,J1+Γ+I,J1+Γ+I,HKY+Γ,J3+I,J2+Γ,J3+Γ,GTR+Γ,HKY+Γ,J1+Γ         | 012340+Γ                     | Mix+:Γ+I,Γ+I,Γ+I,Γ+I,Γ+I,Γ+I,Γ+I,Γ+I         | CAT+GTR+Γ            |            |
| 11 taxa                   | <i>atp6</i>                | 684                                                                 | HKY+Γ,J1+Γ+I,J3+Γ+I          | 010020+Γ+I                                   | Mix+:Γ,I,Γ+I         | CAT+GTR+Γ  |
|                           | <i>atp8</i>                | 168                                                                 | TN,HKY+I,HKY+I               | 010023+I                                     | Mix+:E,I,I           | CAT+GTR+Γ  |
|                           | <i>cox1</i>                | 1,584                                                               | J3+Γ+I,HKY+I, TN+Γ+I         | 012310+Γ+I                                   | Mix+:Γ+I,E,Γ         | CAT+GTR+Γ  |
|                           | <i>cox2</i>                | 684                                                                 | J2+I,HKY+I,J3+Γ              | HKY+Γ+I                                      | Mix+:Γ,I,Γ           | CAT+GTR+Γ  |
|                           | <i>cox3</i>                | 784                                                                 | J3+Γ,HKY+Γ+I,J1+Γ+I          | 010210+Γ+I                                   | Mix+:Γ,I,Γ+I         | CAT+GTR+Γ  |
|                           | <i>cytb</i>                | 1,140                                                               | J2+Γ,J1+I,J1+Γ+I             | 010230+Γ+I                                   | Mix+:I,I,I           | CAT+GTR+Γ  |
|                           | <i>nd1</i>                 | 981                                                                 | HKY+I,HKY+Γ+I,TVM+Γ+I        | HKY+Γ+I                                      | Mix+:I,I,Γ+I         | CAT+GTR+Γ  |
|                           | <i>nd2</i>                 | 1,040                                                               | J1+Γ,J1+Γ+I,J3+Γ+I           | 010023+Γ+I                                   | Mix+:Γ,Γ+I,Γ         | CAT+GTR+Γ  |
|                           | <i>nd3</i>                 | 350                                                                 | HKY+Γ,HKY+Γ,J1+Γ             | 010230+Γ+I                                   | Mix+:Γ,Γ,Γ           | CAT+GTR+Γ  |
|                           | <i>nd4</i>                 | 1,393                                                               | J1+Γ,J1+Γ+I,TN+Γ+I           | 010020+Γ+I                                   | Mix+:Γ,Γ+I,Γ+I       | CAT+GTR+Γ  |
|                           | <i>nd4L</i>                | 297                                                                 | HKY+Γ,HKY+I,HKY+I            | 012212+Γ                                     | Mix+:E,E,I           | CAT+GTR+Γ  |
|                           | <i>nd5</i>                 | 1,815                                                               | J2+Γ+I,HKY+Γ+I,J1+Γ+I        | 010212+Γ+I                                   | Mix+:Γ,Γ+I,Γ+I       | CAT+GTR+Γ  |
|                           | <i>nd6</i>                 | 513                                                                 | J3+Γ,HKY+Γ,J2+Γ              | 010012+Γ+I                                   | Mix+:Γ,Γ,Γ           | CAT+GTR+Γ  |
|                           | <i>12s rRNA</i>            | 962                                                                 | GTR+Γ                        | 010023+Γ                                     | Mix+Γ                | GTR+Γ      |
|                           | <i>16s rRNA</i>            | 1,568                                                               | GTR+Γ                        | 010234+Γ+I                                   | Mix+Γ+I              | GTR+Γ      |
|                           | <i>tRNA1<sup>1</sup></i>   | 560                                                                 | HKY+Γ                        | 012010+Γ+I                                   | Mix+Γ+I              | GTR+Γ      |
|                           | <i>tRNA2<sup>2</sup></i>   | 988                                                                 | J1+Γ                         | 012032+Γ+I                                   | Mix+Γ+I              | GTR+Γ      |
|                           | <i>control region (CR)</i> | 1,477                                                               | J2+Γ                         | 010213+Γ                                     | Mix+Γ                | GTR+Γ      |
| <i>ALL<sup>3</sup></i>    | 16,952                     | GTR+Γ+I,J1+Γ+I,GTR+Γ+I,J3+Γ,TVM+Γ,J2+Γ,J1+Γ,GTR+Γ,J2+Γ,HKY+Γ+I,J1+Γ | 012314+Γ+I                   | Mix+:Γ+I,Γ+I,Γ+I,Γ+I,Γ+I,Γ+I,Γ+I,Γ+I,Γ+I,Γ+I | CAT+GTR+Γ            |            |
| <i>ALL-CR<sup>4</sup></i> | 15,475                     | GTR+Γ+I,J1+Γ+I,GTR+Γ+I,J3+Γ,TVM+Γ,J2+I,GTR+Γ,GTR+Γ,TVM+Γ+I,J1+Γ     | 012310+Γ+I                   | Mix+:Γ+I,Γ+I,Γ+I,Γ+I,Γ+I,Γ+I,Γ+I,Γ+I         | CAT+GTR+Γ            |            |

<sup>1</sup> - includes tRNA-Ala, tRNA-Asn, tRNA-Cys, tRNA-Gln, tRNA-Glu, tRNA-Pro, tRNA-Ser1 and tRNA-Tyr; <sup>2</sup> - includes tRNA-Arg, tRNA-Asp, tRNA-Gly, tRNA-His, tRNA-Ile, tRNA-Leu1, tRNA-Leu2, tRNA-Lys, tRNA-Met, tRNA-Phe, tRNA-Ser2, tRNA-Thr, tRNA-Trp and tRNA-Val; <sup>3</sup> - includes all the nucleotide markers; <sup>4</sup> - the same as <sup>3</sup> but without CR; <sup>5</sup> - E means equal rates across sites.
