# Supplementary material for: The influence of molecular markers and methods on inferring the phylogenetic relationships between the representatives of the Arini (parrots, Psittaciformes), determined on the basis of their complete mitochondrial genomes
Source: PubMed Central journal article supplement (PMC5513162; doi:10.1186/s12862-017-1012-1), 2017-07-14

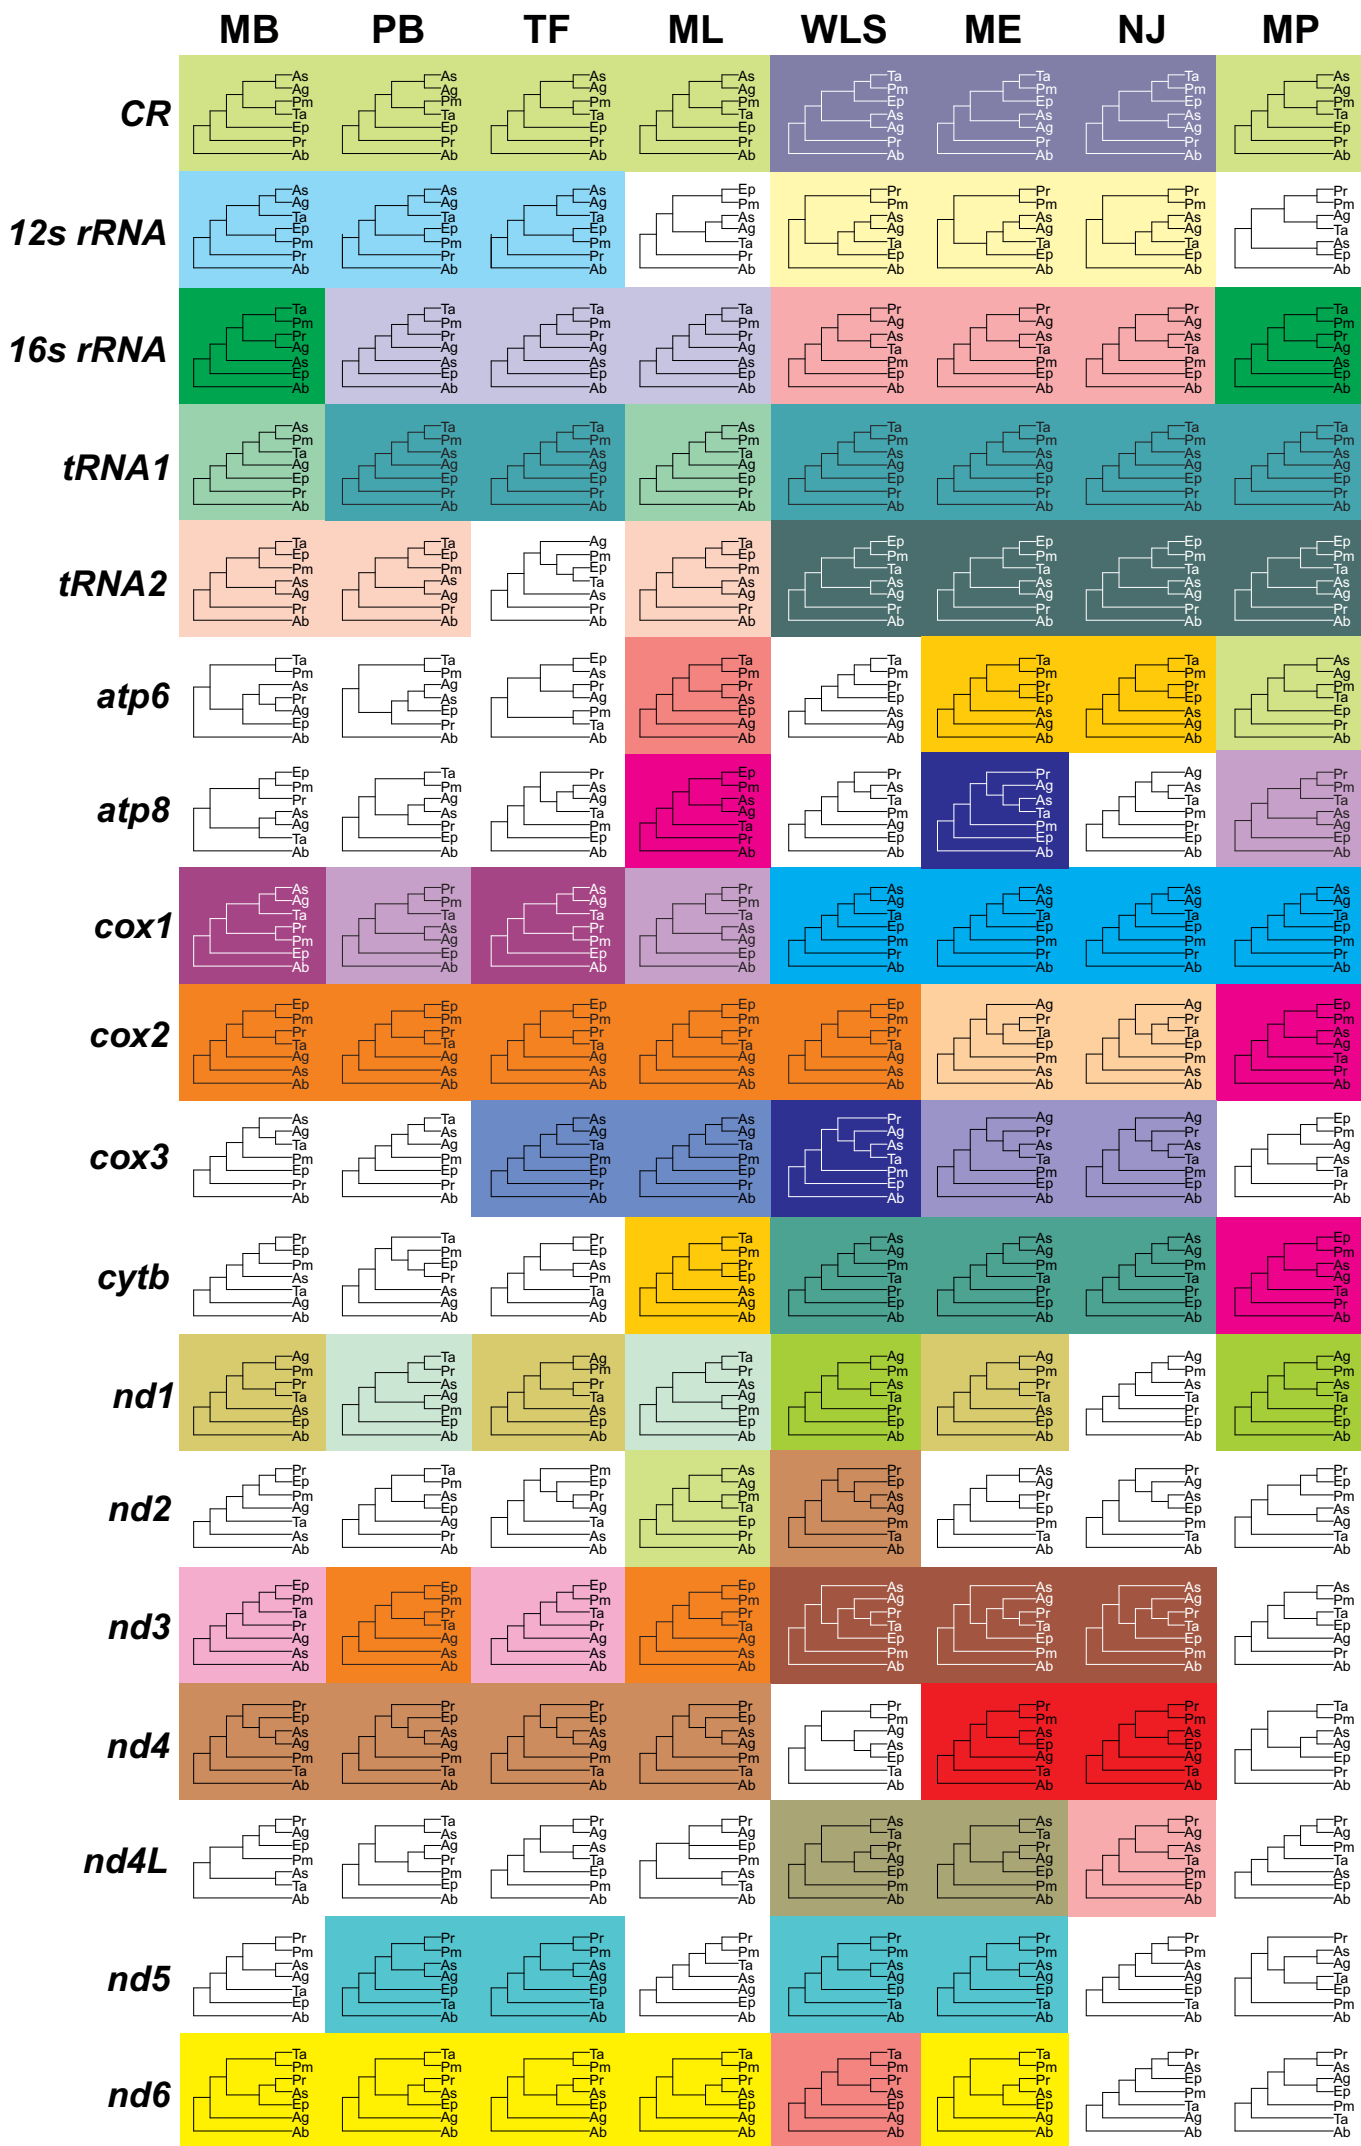

Supplement: 12862_2017_1012_MOESM3_ESM.pdf [file 12862_2017_1012_MOESM3_ESM.pdf]
